# Supplementary material
Source: PubMed Central journal article supplement (PMC5028112)

## SUPPLEMENTARY TABLES

**Supplementary Table 1.** List of all commercial and non-commercial compounds tested using the RED assay in this study. Each compound is listed with their respective chemical structure in SMILES format (Simplified molecular-input line-entry system) and physicochemical properties (1).

| Name or ID #                  | Source / Description | SMILES                                                                                                                                                                              | fu (%) | MW    | Arom_Rings | Mol_Sol | Sp2 | IW1_VS | Plasma PB |
|-------------------------------|----------------------|-------------------------------------------------------------------------------------------------------------------------------------------------------------------------------------|--------|-------|------------|---------|-----|--------|-----------|
| Ethambutol                    | Anti-TB drug         | <chem>CC[C@@H](CO)NCCN[C@@H](CC)CO</chem>                                                                                                                                           | 38.8   | 204.3 | 0          | -1.418  | 0   | 0.080  | 0.916     |
| Isoniazid                     | Anti-TB drug         | <chem>c1cnccc1C(=O)NN</chem>                                                                                                                                                        | 67.2   | 137.1 | 1          | -0.951  | 6   | 0.131  | 0.916     |
| Pyrazinamide                  | Anti-TB drug         | <chem>c1cnc(cn1)C(=N)O</chem>                                                                                                                                                       | 62.0   |       |            |         |     |        |           |
| <i>p</i> -aminosalicylic acid | Anti-TB drug         | <chem>c1cc(C(O)=O)c(O)cc1N</chem>                                                                                                                                                   | 51.1   | 153.1 | 1          | -0.9    | 7   | 0.134  | 0.916     |
| Rifampicin                    | Anti-TB drug         | <chem>C[C@H]1/C=C/C=C(\C(=O)NC2=C(C(=C3C(=C2O)C(=C(C4=C3C(=O)[C@](O4)(O/C=C/[C@@H]([C@H]([C@H]([C@@H]([C@@H]([C@@H]([C@H]1O)C)O)C)OC(=O)C)OC)C)O)O)/C=N/N5CCN(CC5)C)/C</chem>       | 7.3    | 822.9 | 2          | -6.389  | 20  | 0.014  | 0.500     |
| Rifapentine                   | Anti-TB drug         | <chem>C[C@H]1/C=C/C=C(\C(=O)NC2=C(C(=C3C(=C2O)C(=C(C4=C3C(=O)[C@](O4)(O/C=C/[C@@H]([C@H]([C@H]([C@@H]([C@@H]([C@@H]([C@H]1O)C)O)C)OC(=O)C)OC)C)O)O)/C=N/N5CCN(CC5)C6CCCC6)/C</chem> | 1.1    | 877.0 | 2          | -7.541  | 20  | 0.023  | 0.500     |
| Moxifloxacin                  | Anti-TB drug         | <chem>COc1c2c(cc(c1N3C[C@@H]4CCCN[C@@H]4C3)F)c(=O)c(cn2C5CC5)C(=O)O</chem>                                                                                                          | 16.8   | 401.4 | 2          | -3.066  | 10  | 0.110  | 0.916     |
| Levofloxacin                  | Anti-TB drug         | <chem>C[C@H]1COc2c3n1cc(c(=O)c3cc(c2N4CCN(CC4)C)F)C(=O)O</chem>                                                                                                                     | 16.3   | 361.4 | 2          | -1.607  | 10  | 0.104  | 0.916     |
| Gatifloxacin                  | Anti-TB drug         | <chem>CC1CN(CC1)c2c(cc3c(c2OC)n(cc(c3=O)C(=O)O)C4CC4)F</chem>                                                                                                                       | 18.8   | 375.4 | 2          | -2.658  | 10  | 0.093  | 0.916     |
| Linezolid                     | Anti-TB drug         | <chem>CC(=O)NC[C@H]1CN(C(=O)O1)c2ccc(c(c2)F)N3CCOCC3</chem>                                                                                                                         | 27.9   | 337.3 | 1          | -1.927  | 8   | 0.038  | 0.916     |
| Posizolid                     | Anti-TB drug         | <chem>c1conc1OC[C@H]2CN(C(=O)O2)c3cc(c(c3)F)C4=CCN(CC4)C(=O)[C@H](CO)O)F</chem>                                                                                                     | 17.6   | 465.4 | 2          | -3.267  | 13  | 0.069  | 0.200     |
| Sutezolid                     | Anti-TB drug         | <chem>CC(=O)NC[C@H]1CN(C(=O)O1)c2ccc(c(c2)F)N3CCSCC3</chem>                                                                                                                         | 21.7   | 353.4 | 1          | -2.875  | 8   | 0.059  | 0.916     |

|             |                |                                                                                          |       |       |   |         |    |       |       |
|-------------|----------------|------------------------------------------------------------------------------------------|-------|-------|---|---------|----|-------|-------|
| Radezolid   | Anti-TB drug   | <chem>CC(=O)NC[C@H]1CN(C(=O)O1)C2=CC(=C(C=C2)C3=CC=C(C=C3)CNCC4=CN=NN4)F</chem>          | 7.6   | 438.5 | 3 | -5.041  | 16 | 0.048 | 0.771 |
| Tedizolid   | Anti-TB drug   | <chem>CN1N=C(N=N1)C2=NC=C(C=C2)C3=C(C=C(C=C3)N4C[C@H](OC4=O)CO)F</chem>                  | 13.7  | 450.3 | 3 | -2.934  | 13 | 0.061 | 0.771 |
| Clofazimine | Anti-TB drug   | <chem>CC(C)/N=c/1\cc-2n(c3cccc3nc2cc1Nc4ccc(cc4)Cl)c5cc(cc5)Cl</chem>                    | <0.01 | 473.4 | 4 | -8.969  | 24 | 0.033 | 0.099 |
| Bedaquiline | Anti-TB drug   | <chem>CN(C)CC[C@H](c1cccc2c1cccc2)([C@H](c3cccc3)c4cc5ccc(ccc5nc4OC)Br)O</chem>          | <0.01 | 555.5 | 5 | -10.636 | 25 | 0.026 | 0.179 |
| PA-824      | Anti-TB drug   | <chem>c1cc(ccc1CO[C@H]2Cn3cc(nc3OC2)[N+](=O)[O-])OC(F)(F)F</chem>                        | 3.6   | 359.3 | 2 | -4.814  | 9  | 0.067 | 0.154 |
| OPC67683    | Anti-TB drug   | <chem>C[C@@]1(Cn2cc(nc2O1)[N+](=O)[O-])COc3ccc(cc3)N4CCC(CC4)Oc5ccc(cc5)OC(F)(F)F</chem> | 0.02  | 534.5 | 3 | -7.203  | 15 | 0.069 | 0.164 |
| LLY001      | Eli Lilly, UBA | <chem>Cc1ncc(n1CCO)N(=O)=O</chem>                                                        | 63.2  | 171.2 | 1 | -1.293  | 3  | 0.062 | 0.916 |
| LLY002      | Eli Lilly, UBA | <chem>CN(c1ccc(C(=O)N[C@H](C(=O)O)CCC(=O)O)cc1)Cc1[n]c2c([n]c1)[n]c([n]c2N)N</chem>      | 15.3  | 454.4 | 3 | -3.639  | 15 | 0.072 | 0.771 |
| LLY003      | Eli Lilly, UBA | <chem>CC(C)(C)NC[C@H](c1ccc(c(c1)CO)O)O</chem>                                           | 34.0  | 239.3 | 1 | -2.341  | 6  | 0.126 | 0.916 |
| LLY004      | Eli Lilly, UBA | <chem>CN1C(=C(c2cccc2S1(=O)=O)O)C(=O)Nc3ccccn3</chem>                                    | 22.8  | 331.3 | 2 | -3.302  | 14 | 0.079 | 0.771 |
| LLY005      | Eli Lilly, UBA | <chem>CC(C)(C)NC[C@H](c1cc(cc(c1)OC(=O)N(C)C)OC(=O)N(C)C)O</chem>                        | 28.1  | 367.4 | 1 | -3.383  | 8  | 0.032 | 0.916 |
| LLY006      | Eli Lilly, UBA | <chem>OC(=O)[C@H]1N(CSC1)C(=O)[C@H]1NC(=O)CC1</chem>                                     | 79.05 | 244.3 | 0 | -0.69   | 3  | 0.117 | 0.916 |
| LLY007      | Eli Lilly, UBA | <chem>Cc1cnc(cn1)C(=O)NCCc2ccc(cc2)S(=O)(=O)NC(=O)NC3CCCCC3</chem>                       | 10    | 445.5 | 2 | -5.77   | 12 | 0.053 | 0.143 |
| LLY008      | Eli Lilly, UBA | <chem>C1CCN(CC1)c2c3c(c(nc(n3)N(CCO)CCO)N4CCCCC4)nc(n2)N(CCO)CCO</chem>                  | 1.78  | 504.6 | 2 | -0.856  | 6  | 0.026 | 0.500 |
| LLY009      | Eli Lilly, UBA | <chem>COc1cc(c(cc1C(=O)N[C@H]2CCN(C[C@H]2OC)CCCOc3ccc(cc3)F)Cl)N</chem>                  | 2.37  | 465.9 | 2 | -5.48   | 13 | 0.015 | 0.164 |
| LLY010      | Eli Lilly, UBA | <chem>c1ccc2c(c1)N(c3cc(ccc3S2)Cl)CCCN4CCN(CC4)CCO</chem>                                | 0.11  | 404.0 | 2 | -4.403  | 12 | 0.089 | 0.056 |
| LLY011      | Eli Lilly, UBA | <chem>CN(C)CCCN1c2cccc2Sc3c1cc(cc3)Cl</chem>                                             | 0.08  | 318.9 | 2 | -4.848  | 12 | 0.026 | 0.179 |
| LLY012      | Eli Lilly, UBA | <chem>CCCc1nc2c(cc(cc2n1Cc3ccc(cc3)c4ccc(cc4C(=O)O)c5nc6cccc6n5C)C</chem>                | 0.75  | 514.6 | 6 | -11.079 | 27 | 0.033 | 0.164 |
| LLY013      | Eli Lilly, UBA | <chem>CC(C)COCC(CN(Cc1cccc1)c2cccc2)N3CCCC3.Cl</chem>                                    | 0.4   | 366.5 | 2 | -5.524  | 12 | 0.018 | 0.164 |

|             |                 |                                                                                              |       |       |   |        |    |       |       |
|-------------|-----------------|----------------------------------------------------------------------------------------------|-------|-------|---|--------|----|-------|-------|
| LLY014      | Eli Lilly, UBA  | CN(C)CCCN1c2cccc2CCc3c1cc(cc3)Cl.Cl                                                          | 0.21  | 314.9 | 2 | -5.325 | 12 | 0.025 | 0.179 |
| LLY015      | Eli Lilly, UBA  | [H][C@]12CN(C[C@]1[[C@@H]2N)[H]]c3c(cc4c(=O)c(cn(c4n3)c5ccc(cc5F)F)C(=O)O)F                  | 12.1  | 416.4 | 3 | -4.037 | 15 | 0.029 | 0.771 |
| LLY016      | Eli Lilly, UBA  | Cn1c(nc(=O)c(n1)O)SCC2=C(N3[C@@H]1[C@@H](C3=O)NC(=O)/C(=N/OC)/c4csc(n4)N)SC2)C(=O)[O-].[Na+] | 24.4  | 554.6 | 2 | -3.982 | 12 | 0.100 | 0.333 |
| DDD00031548 | DDU, PZA analog | Cc1cnc(C(Nc2ccc(OC(F)(F)F)cc2)=O)cn1                                                         | 0.87  | 297.2 | 2 | -4.714 | 11 | 0.084 | 0.099 |
| DDD00085385 | DDU, PZA analog | Oc1ccc(c2cnc3c(n2)nc(O)nc3O)cc1                                                              | 24.29 | 256.2 | 3 | -2.29  | 12 | 0.139 | 0.771 |
| DDD00309053 | DDU, PZA analog | Nc1nccnc1C(O)=O                                                                              | 86.78 | 139.1 | 1 | -0.548 | 5  | 0.120 | 0.916 |
| DDD00401795 | DDU, PZA analog | CC1CN(S(N2CCN(C(c3nccnc3N)=O)CC2)(=O)=O)CC(O1)C                                              | 45.93 | 384.5 | 1 | -0.525 | 5  | 0.046 | 0.500 |
| DDD00404833 | DDU, PZA analog | Cc1cnc(C(Nc2cc(C(C)C)nn2c3ccc(F)cc3)=O)cn1                                                   | 1.19  | 353.4 | 3 | -5.865 | 14 | 0.043 | 0.099 |
| DDD00486000 | DDU, PZA analog | Cc1cc(C)c(NC(c2cncn2)=O)c(C)c1                                                               | 25.58 | 241.3 | 2 | -4.031 | 11 | 0.130 | 0.099 |
| DDD00497644 | DDU, PZA analog | COc1ccc(NC(c2nccnc2N)=O)cn1                                                                  | 23.2  | 245.2 | 2 | -2.105 | 10 | 0.078 | 0.771 |
| DDD00529297 | DDU, PZA analog | COc1ccc(NC(c2cnc3c(n2)cccc3)=O)cn1                                                           | 7.18  | 280.3 | 3 | -3.761 | 14 | 0.084 | 0.771 |
| DDD00771048 | DDU, PZA analog | CNC(c1nccnc1N)=O                                                                             | >99.9 | 152.2 | 1 | -0.736 | 5  | 0.119 | 0.916 |
| DDD01012369 | DDU, PZA analog | COC(c1nc(Cl)c(N)nc1N)=O                                                                      | 51.84 | 202.6 | 1 | -1.385 | 5  | 0.106 | 0.916 |
| DDD01012370 | DDU, PZA analog | NC(c1cnc(N)cn1)=O                                                                            | >99.9 | 138.1 | 1 | -0.562 | 5  | 0.085 | 0.916 |
| DDD01012371 | DDU, PZA analog | Cc1cnc(C(Nc2nnc(C(F)(F)F)[nH]2)=O)cn1                                                        | >99.9 | 272.2 | 2 | -3.394 | 7  | 0.117 | 0.916 |
| DDD01012372 | DDU, PZA analog | Cc1cnc(C(Nc2cccc2C(N3CCCC3)=O)=O)cn1                                                         | 39.92 | 310.4 | 2 | -3.505 | 12 | 0.068 | 0.099 |
| DDD01012374 | DDU, PZA analog | FC(COc1ccc(S(N2CCCC2)(=O)=O)cc1NC(c3cncnc3)=O)(F)F                                           | 2.42  | 430.4 | 2 | -4.281 | 11 | 0.036 | 0.099 |
| DDD01012375 | DDU, PZA analog | Nc1nccnc1C(Nc2cccc(CNC(Nc3cccc3Cl)=O)c2)=O                                                   | 0.58  | 396.8 | 3 | -5.435 | 18 | 0.028 | 0.099 |
| DDD01012376 | DDU, PZA analog | Cc1c(c2cccc2)sc(NC(c3cncnc3)=O)c1C(N4CCOCC4)=O                                               | 1.71  | 408.5 | 3 | -5.058 | 16 | 0.064 | 0.099 |

|             |                      |                                                              |       |       |   |        |    |       |       |
|-------------|----------------------|--------------------------------------------------------------|-------|-------|---|--------|----|-------|-------|
| DDD01012377 | DDU, PZA analog      | <chem>CC(Oc1ccc(CNC(c2cnc(C)cn2)=O)cn1)C</chem>              | 16.36 | 286.3 | 2 | -3.691 | 10 | 0.088 | 0.771 |
| DDD01012378 | DDU, PZA analog      | <chem>Cc1cnc(C(NCc2ccccc2S(N3CCCCC3)(=O)=O)=O)cn1</chem>     | 7.61  | 374.5 | 2 | -4.007 | 11 | 0.063 | 0.099 |
| DDD01012379 | DDU, PZA analog      | <chem>CCc1cccc(C)c1NC(c2cnc3c(n2)cccc3)=O</chem>             | 1.22  | 291.3 | 3 | -5.434 | 15 | 0.079 | 0.099 |
| DDD01012380 | DDU, PZA analog      | <chem>CCN(CCNC(c1nccnc1NC(c2ccccc2)=O)=O)CC</chem>           | 31.31 | 341.4 | 2 | -3.708 | 12 | 0.058 | 0.889 |
| DDD01012381 | DDU, PZA analog      | <chem>O=C(c1cncn1)Nc2cn[nH]c2</chem>                         | >99.9 | 189.2 | 2 | -1.2   | 8  | 0.072 | 0.916 |
| DDD01012382 | DDU, PZA analog      | <chem>Cc1c(NC(c2cncn2)=O)cccc1C(N)=O</chem>                  | >99.9 | 256.3 | 2 | -3.125 | 12 | 0.049 | 0.771 |
| DDD01012383 | DDU, PZA analog      | <chem>CS(NCCNC(c1nccnc1N)=O)(=O)=O</chem>                    | >99.9 | 259.3 | 1 | -1.334 | 5  | 0.059 | 0.916 |
| DDD01012384 | DDU, PZA analog      | <chem>COc1cc(CNC(c2nccnc2N)=O)ccc1O</chem>                   | 80.48 | 274.3 | 2 | -2.359 | 11 | 0.052 | 0.771 |
| DDD01012385 | DDU, PZA analog      | <chem>NC(c1cnc2c(n1)cccc2)=O</chem>                          | >99.9 | 173.2 | 2 | -2.16  | 9  | 0.173 | 0.916 |
| DDD01012386 | DDU, PZA analog      | <chem>Nc1nccnc1C(NCc2cc3c([nH]2)cccc3)=O</chem>              | 4.02  | 267.3 | 3 | -3.32  | 13 | 0.130 | 0.771 |
| DDD01012387 | DDU, PZA analog      | <chem>CC(c1cnc2c(n1)cccc2)=O</chem>                          | 33.22 | 172.2 | 2 | -2.537 | 9  | 0.115 | 0.916 |
| DDD01012388 | DDU, PZA analog      | <chem>Nc1nc2c(nc1C(O)=O)cccc2</chem>                         | 51.64 | 189.2 | 2 | -1.894 | 9  | 0.176 | 0.916 |
| DDD01012461 | DDU, PZA analog      | <chem>CS(N1CCC(CNC(c2cncn2)=O)CC1)(=O)=O</chem>              | 31.77 | 298.4 | 1 | -1.952 | 5  | 0.061 | 0.916 |
| DDD01012463 | DDU, PZA analog      | <chem>Cc1cnc(C(N2CCN(c3ncccn3)CC2)=O)cn1</chem>              | 35.97 | 284.3 | 2 | -1.464 | 9  | 0.055 | 0.500 |
| DDD01012464 | DDU, PZA analog      | <chem>OC(c1nccnc1C(Nc2ccc(S(N3CCOCC3)(=O)=O)cc2)=O)=O</chem> | 18.36 | 392.4 | 2 | -2.672 | 12 | 0.063 | 0.771 |
| DDD01012612 | DDU, PZA analog      | <chem>O=C(c1cncn1)NCC2CC2</chem>                             | >99.9 | 177.2 | 1 | -1.659 | 5  | 0.157 | 0.916 |
| DDD01010956 | NIH / DDU, TB-active | <chem>Nc1cccc(F)c1C(O)=O</chem>                              | 36.8  | 155.1 | 1 | -1.613 | 7  | 0.205 | 0.916 |
| DDD00301814 | NIH / DDU, TB-active | <chem>Nc1ccc(F)cc1C(O)=O</chem>                              | 47.25 | 155.1 | 1 | -1.618 | 7  | 0.151 | 0.916 |
| DDD01270522 | NIH / DDU, TB-active | <chem>Nc1cc(F)ccc1C(O)=O</chem>                              | 31.8  | 155.1 | 1 | -1.612 | 7  | 0.056 | 0.916 |
| DDD01010955 | NIH / DDU, TB-active | <chem>Nc1c(F)cccc1C(O)=O</chem>                              | 43.8  | 155.1 | 1 | -1.604 | 7  | 0.118 | 0.916 |

|             |                      |                                                                            |        |       |   |        |    |       |       |
|-------------|----------------------|----------------------------------------------------------------------------|--------|-------|---|--------|----|-------|-------|
| DDD00630425 | NIH / DDU, TB-active | <chem>COc1ccc(c2[nH]c3c(c2CCC(Nc4ccc5c(NC(C(O5)C)=O)c4)=O)cccc3)cc1</chem> | 0.0799 | 455.5 | 4 | -7.222 | 22 | 0.073 | 0.099 |
| DDD00613993 | NIH / DDU, TB-active | <chem>CC(n1ncc2c1nc(c3cccc3)cc2C(NCC(c4cccc4)N5CCCC5)=O)C</chem>           | 0.0129 | 443.5 | 4 | -6.735 | 17 | 0.052 | 0.164 |
| DDD00806527 | NIH / DDU, TB-active | <chem>CN(c1cc(C(Nc2cccc2)=O)ncn1)Cc3cc(c(Cl)c(Cl)c3</chem>                 | 0.1    | 387.3 | 3 | -6.237 | 17 | 0.021 | 0.164 |
| DDD00685697 | NIH / DDU, TB-active | <chem>Fc1ccc(OCc2nc(CSc3nnc(c4ccncc4)o3)cs2)cc1</chem>                     | 0.43   | 400.5 | 4 | -6.497 | 16 | 0.029 | 0.099 |
| DDD00281126 | NIH / DDU, TB-active | <chem>Clc1ccc(c2cc3c(s2)(n4cnnc4C#N)ncn3)cc1</chem>                        | 0.013  | 338.8 | 4 | -6.053 | 14 | 0.149 | 0.099 |
| DDD01009187 | NIH / DDU, TB-active | <chem>COc1ccc(c2n(C)c3c([n+]2CC(OC4CC(CCC4C(C)C)=O)cccc3)cc1</chem>        | 0.016  | 435.6 | 3 | -7.817 | 14 | 0.033 | 0.164 |
| DDD00935077 | NIH / DDU, TB-active | <chem>Cc1onc(c2cccc2Cl)c1C(OC3cccc4c3ncc4)=O</chem>                        | 0.19   | 364.8 | 4 | -6.767 | 19 | 0.043 | 0.099 |
| DDD01010816 | NIH / DDU, TB-active | <chem>CCCc1cc(c2nc(c3ccc(OC(F)F)cc3)cs2)ccn1</chem>                        | 0.003  | 346.4 | 3 | -7.602 | 14 | 0.056 | 0.099 |
| DDD00302363 | NIH / DDU, TB-active | <chem>CCCc1cc(c2nc(c3ccc(OC)c3)cs2)ccn1</chem>                             | 0.0018 | 310.4 | 3 | -6.559 | 14 | 0.011 | 0.099 |
| DDD01009188 | NIH / DDU, TB-active | <chem>CC1CCC(C(OC(C[n+]2c(c3cccc3)n(C)c4c2cccc4)=O)C1)C(C)C</chem>         | 0.136  | 405.6 | 3 | -7.72  | 14 | 0.034 | 0.164 |
| DDD00054958 | NIH / DDU, TB-active | <chem>Fc1ccc(c2nonc2NC(c3sc4c(c3Cl)cccc4)=O)cc1</chem>                     | 0.0168 | 373.8 | 4 | -6.867 | 17 | 0.093 | 0.099 |
| DDD00853474 | NIH / DDU, TB-active | <chem>CC1=CC(NC(n2nc(C)cc2NC(COc3ccc(C)cc3)=O)=N1)=O</chem>                | 1.22   | 373.8 | 3 | -4.562 | 14 | 0.033 | 0.154 |
| DDD00309396 | NIH / DDU, TB-active | <chem>Cc1nc2n(c(NCc3ccccn3)c1C)ncc2c4cccc4</chem>                          | 0.029  | 329.4 | 4 | -5.365 | 17 | 0.018 | 0.164 |
| DDD00664718 | NIH / DDU, TB-active | <chem>NS(c1ccc2c(CCN2Cc3nc4c(n3CCO)cc(Cl)cc4)c1)(=O)=O</chem>              | 8.02   | 406.9 | 3 | -4.479 | 13 | 0.074 | 0.154 |
| DDD00709278 | NIH / DDU, TB-active | <chem>CCC1nc2n(n1)c(O)c(Cc3ccc(Cl)cc3)c(C)n2</chem>                        | 4.75   | 302.8 | 3 | -4.178 | 11 | 0.069 | 0.099 |
| DDD01008487 | NIH / DDU, TB-active | <chem>Cc1nn2c(c1c3cccc3)nc(c4ccc(F)cc4)c2O</chem>                          | 0.37   | 319.3 | 4 | -5.186 | 18 | 0.072 | 0.099 |
| DDD00696423 | NIH / DDU, TB-active | <chem>Cc1cccc(N2CCN(CC2)CCNC(CCN3C=Nc4c(C3=O)c(CCCC5)c5s4)=O)c1</chem>     | 0.29   | 479.6 | 3 | -5.795 | 13 | 0.044 | 0.056 |
| DDD01008622 | NIH / DDU, TB-active | <chem>FC(Oc1ccc2c(c1)oc(NC(c3cccc(C(F)F)F)c3)=O)n2)(F)F</chem>             | 0.016  | 390.2 | 3 | -6.891 | 14 | 0.039 | 0.099 |
| DDD00054872 | NIH / DDU, TB-active | <chem>Clc1c(C(Nc2nonc2c3cccs3)=O)sc4c1ccc4</chem>                          | 0.16   | 361.8 | 4 | -6.617 | 15 | 0.109 | 0.099 |
| DDD00546354 | NIH / DDU, TB-active | <chem>CC(C(Nc1ccc(C(F)F)cc1)=O)Nc2ccc3c(OCCO3)c2</chem>                    | 0.33   | 366.3 | 2 | -5.26  | 13 | 0.070 | 0.099 |

|             |                      |                                                                  |       |       |   |        |    |       |       |
|-------------|----------------------|------------------------------------------------------------------|-------|-------|---|--------|----|-------|-------|
| DDD00003013 | NIH / DDU, TB-active | <chem>COc1ccc(c2csc3c2C(OC(c4cccc4OC)=N3)=O)cc1</chem>           | 0.038 | 365.4 | 4 | -6.106 | 18 | 0.052 | 0.099 |
| DDD00507713 | NIH / DDU, TB-active | <chem>CCC1CCCC2c1[nH]cc2C(Cn3nnc(c4cccs4)n3)=O</chem>            | 0.11  | 337.4 | 4 | -5.473 | 14 | 0.071 | 0.099 |
| DDD00175986 | NIH / DDU, TB-active | <chem>Cc1nc(C)c(c2cc(O)n3c(n2)c(c4cccc4)c(C)n3)s1</chem>         | 1.04  | 336.4 | 4 | -5.391 | 15 | 0.062 | 0.099 |
| DDD00275330 | NIH / DDU, TB-active | <chem>CCCc1ccc(NC(C(Nc2ccc3c(NC(N3)=O)c2)=O)C)cc1</chem>         | 0.74  | 338.4 | 3 | -5.091 | 14 | 0.142 | 0.099 |
| DDD00304844 | NIH / DDU, TB-active | <chem>COc1ccc(CNc2nc3n(C(C4=C(N3)CCC4)=O)n2)cc1</chem>           | 26.7  | 311.3 | 3 | -3.04  | 11 | 0.010 | 0.099 |
| DDD01008485 | NIH / DDU, TB-active | <chem>CCCc1cc(O)n2c(n1)c(c3ccc(Cl)cc3)cn2</chem>                 | 0.62  | 287.7 | 3 | -4.404 | 12 | 0.102 | 0.099 |
| DDD01008654 | NIH / DDU, TB-active | <chem>Fc1cc(C(Nc2nc3c(o2)cc(OC(F)(F)F)cc3)=O)ccc1C#N</chem>      | 0.44  | 365.2 | 3 | -6.06  | 14 | 0.034 | 0.099 |
| DDD01010817 | NIH / DDU, TB-active | <chem>CCCc1cc(c2nc(c3ccc(S(C)(=O)=O)cc3)c s2)ccn1</chem>         | 0.3   | 358.5 | 3 | -6.716 | 14 | 0.040 | 0.099 |
| DDD01009141 | NIH / DDU, TB-active | <chem>CC1(c2ccc(OC(F)F)cc2)NC(N(C1=O)CC(c3ccc(Cl)s3)=O)=O</chem> | 0.34  | 414.8 | 2 | -6.14  | 13 | 0.053 | 0.099 |
| DDD00401639 | NIH / DDU, TB-active | <chem>CCN(c1nc2c(s1)cc(C(Nc3ccc4c(OCO4)c3)=O)s2)CC</chem>        | 0.13  | 375.5 | 3 | -4.678 | 12 | 0.075 | 0.099 |
| DDD00055473 | NIH / DDU, TB-active | <chem>CCCc1ccc(Oc2cc(n3ncc(C(C)=O)c3C)n cn2)cc1</chem>           | 0.02  | 336.4 | 3 | -5.616 | 14 | 0.116 | 0.099 |
| DDD01012298 | NIH / DDU, TB-active | <chem>Fc1ccc(C(Nc2nc3c(o2)cc(Cl)cn3)=O)cc 1OC(F)(F)F</chem>      | 0.67  | 375.7 | 3 | -6.055 | 13 | 0.087 | 0.099 |
| DDD00285816 | NIH / DDU, TB-active | <chem>CCn1c(CSc2nccc(C)n2)nc3c1ccc(NS(C)(=O)=O)c3</chem>         | 22.3  | 377.5 | 3 | -5.145 | 11 | 0.072 | 0.164 |
| DDD00067798 | NIH / DDU, TB-active | <chem>Cc1ccc(c2cc(C(Oc3ccc(C)cc3C)=O)no2 )cc1</chem>             | 0.014 | 307.3 | 3 | -6.097 | 16 | 0.017 | 0.099 |
| DDD00082485 | NIH / DDU, TB-active | <chem>CC1=CC(NC(n2nc(C)cc2NC(c3cc4c(o3)cccc4)=O)=N1)=O</chem>    | 0.19  | 349.3 | 4 | -4.789 | 16 | 0.038 | 0.164 |
| DDD00247711 | NIH / DDU, TB-active | <chem>CC1(c2ccc(OC(F)F)cc2)NC(N(C1=O)CC(c3ccc(F)cc3)=O)=O</chem> | 1.02  | 392.3 | 2 | -5.865 | 15 | 0.003 | 0.099 |
| DDD01009327 | NIH / DDU, TB-active | <chem>CCOc1ccc(C2CC(NC3=C2C(NC(SCC=C)=N3)=O)=O)cc1</chem>        | 2.1   | 357.4 | 2 | -4.379 | 13 | 0.064 | 0.714 |
| DDD00036467 | NIH / DDU, TB-active | <chem>CC(c1ccc2c(OCCO2)c1)NC(c3ccc(Cl)cc 3)=O</chem>             | 1.84  | 317.8 | 2 | -4.764 | 13 | 0.037 | 0.099 |
| DDD00013032 | NIH / DDU, TB-active | <chem>CSc1ccc(CCNC(c2ccc3c(c2)nns3)=O)cc 1</chem>                | 0.94  | 329.4 | 3 | -5.864 | 13 | 0.107 | 0.099 |
| DDD01009316 | NIH / DDU, TB-active | <chem>CCCc1ccc(C2CC(NC3=C2C(NC(SCC=C)=N3)=O)=O)cc1</chem>        | 1.07  | 341.4 | 2 | -4.876 | 13 | 0.067 | 0.164 |

|             |                      |                                                                 |        |       |   |        |    |       |       |
|-------------|----------------------|-----------------------------------------------------------------|--------|-------|---|--------|----|-------|-------|
| DDD01009694 | NIH / DDU, TB-active | <chem>Fc1cc(C(Nc2nc3c(o2)cc(Cl)cn3)=O)ccc1OC(F)(F)F</chem>      | 0.148  | 375.7 | 3 | -6.076 | 13 | 0.098 | 0.099 |
| DDD00336009 | NIH / DDU, TB-active | <chem>O=C(N1CCc2c1cccc2)CNS(c3ccc4c(OC(=O)C3)=O)=O</chem>       | 3.76   | 388.4 | 2 | -3.471 | 13 | 0.044 | 0.200 |
| DDD01009143 | NIH / DDU, TB-active | <chem>CC1(c2ccc(OC(F)F)cc2)NC(N(C1=O)CC(c3cccc3)=O)=O</chem>    | 1.08   | 374.3 | 2 | -5.52  | 15 | 0.055 | 0.099 |
| DDD00303559 | NIH / DDU, TB-active | <chem>CCC(C(Nc1nc2c([nH]1)cccc2)=O)N3N=NC4c(C3=O)cccc4</chem>   | 0.76   | 348.4 | 4 | -4.502 | 15 | 0.024 | 0.099 |
| DDD00507097 | NIH / DDU, TB-active | <chem>Cc1ccc(C(CN2C(NC(c3ccc(OC(F)F)cc3)(C2=O)C)=O)=O)s1</chem> | 0.86   | 394.4 | 2 | -5.883 | 13 | 0.057 | 0.099 |
| DDD00757679 | NIH / DDU, TB-active | <chem>O=C(c1ccc(n2cccn2)cc1)Nc3nc(c4ccccn4)cs3</chem>           | 0.0067 | 347.4 | 4 | -5.568 | 18 | 0.030 | 0.099 |
| DDD00309343 | NIH / DDU, TB-active | <chem>Oc1cc(c2cccc2)nc3n1ncc3c4cccc4</chem>                     | 0.59   | 287.3 | 4 | -4.528 | 18 | 0.100 | 0.099 |
| DDD00649697 | NIH / DDU, TB-active | <chem>O=C(c1cnc2c(n1)cccc2)NCc3ccc(N4C(=O)C3)nc3</chem>         | 8.34   | 349.4 | 3 | -3.798 | 14 | 0.029 | 0.771 |
| DDD00052492 | NIH / DDU, TB-active | <chem>COc1ccc2c(C(C=C(N2CC(Nc3cccc3OC)=O)C)=O)c1</chem>         | 0.82   | 352.4 | 3 | -3.935 | 16 | 0.071 | 0.099 |
| DDD00174774 | NIH / DDU, TB-active | <chem>Cc1nc2n(c1C(NC3ccc(Cl)cc3)=O)ccs2</chem>                  | 5.86   | 305.8 | 3 | -4.431 | 12 | 0.076 | 0.099 |
| DDD01009325 | NIH / DDU, TB-active | <chem>COc1ccc(C2CC(NC3=C2C(NC(SCC#C)=N3)=O)=O)cc1</chem>        | 6.69   | 341.4 | 2 | -3.148 | 11 | 0.046 | 0.154 |
| DDD00306436 | NIH / DDU, TB-active | <chem>COc1ccc(C2CC(NC3=C2C(NC(SCC=C)=N3)=O)=O)cc1</chem>        | 11.1   | 343.4 | 2 | -4.044 | 13 | 0.053 | 0.714 |
| DDD00553694 | NIH / DDU, TB-active | <chem>FC(n1ccnc1COC(CCC2c[nH]c3c2cccc3)=O)F</chem>              | 0.0576 | 319.3 | 3 | -5.205 | 12 | 0.078 | 0.164 |
| DDD00078890 | NIH / DDU, TB-active | <chem>COc1ccc2c(c1)nc(C)c(C(Nc3cc(C)ccn3)=O)c2</chem>           | 2.05   | 307.3 | 3 | -5.158 | 15 | 0.049 | 0.099 |
| DDD00512622 | NIH / DDU, TB-active | <chem>FC(c1csc(NC(Cc2ccc(N3CCCC3=O)cc2)=O)n1)(F)F</chem>        | 2.87   | 369.4 | 2 | -4.812 | 11 | 0.049 | 0.099 |
| DDD00282186 | NIH / DDU, TB-active | <chem>Cc1nc(SCCN2CCOC2=O)c3c(n1)sc3c4cccc4</chem>               | 0.64   | 377.5 | 3 | -5.783 | 11 | 0.026 | 0.099 |
| DDD00080579 | NIH / DDU, TB-active | <chem>CNc1nc(c2ccsc2)nc3c1cccc3</chem>                          | 1.17   | 241.3 | 3 | -4.515 | 12 | 0.031 | 0.164 |
| DDD01009324 | NIH / DDU, TB-active | <chem>CCSC1=NC2=C(C(N1)=O)C(c3ccc(OC)c3)CC(N2)=O</chem>         | 7.13   | 331.4 | 2 | -3.671 | 11 | 0.083 | 0.154 |
| DDD00756232 | NIH / DDU, TB-active | <chem>CC1(c2ccc(C#N)cc2)NC(N(C1=O)CC(c3ccc(F)cc3F)=O)=O</chem>  | 2.956  | 369.3 | 2 | -5.216 | 15 | 0.029 | 0.099 |
| DDD00293239 | NIH / DDU, TB-active | <chem>Cc1nn(c2nc3c(s2)cccc3)c(O)c1CCC#N</chem>                  | 22.4   | 284.3 | 3 | -4.37  | 10 | 0.078 | 0.099 |

|             |                      |                                                          |        |       |   |        |    |       |       |
|-------------|----------------------|----------------------------------------------------------|--------|-------|---|--------|----|-------|-------|
| DDD00097738 | NIH / DDU, TB-active | CC1CCN(Cc2c(O)ccc3c2C(C=C(c4ccco4)O3)=O)CC1              | 2.16   | 339.4 | 3 | -3.887 | 13 | 0.028 | 0.164 |
| DDD00302941 | NIH / DDU, TB-active | C[C@@]([H])(C(Nc1nc2c(s1)cccc2)=O)N3N=Nc4c(C3=O)cccc4    | 0.54   | 351.4 | 4 | -5.3   | 15 | 0.057 | 0.099 |
| DDD00055877 | NIH / DDU, TB-active | COc1cnc(c2cccc2)nc1N3CCCC3                               | 0.12   | 255.3 | 2 | -3.198 | 10 | 0.033 | 0.164 |
| DDD00175988 | NIH / DDU, TB-active | Cc1nn2c(c1c3cccc3)nc(c4cnccn4)cc2O                       | 4.5    | 303.3 | 4 | -3.938 | 16 | 0.103 | 0.099 |
| DDD01009328 | NIH / DDU, TB-active | C=CCSC1=NC2=C(C(N1)=O)C(c3ccc4c(OCO4)c3)CC(N2)=O         | 3.68   | 357.4 | 2 | -3.291 | 13 | 0.062 | 0.771 |
| DDD00806486 | NIH / DDU, TB-active | O=C(C1CC1)Nc2ccc(C3=Nc4c(C(O3)=O)cccc4)cc2               | 0.169  | 306.3 | 3 | -4.482 | 15 | 0.032 | 0.099 |
| DDD00242108 | NIH / DDU, TB-active | CCc1cccc2c1[nH]cc2C(CN3C(Nc4c(C3=O)cccc4)=O)=O           | 0.3    | 347.4 | 4 | -4.766 | 17 | 0.081 | 0.099 |
| DDD00000113 | NIH / DDU, TB-active | Cc1cccc(Cn2ccc(NC(c3ccc3)=O)n2)c1                        | 5.06   | 281.3 | 3 | -4.693 | 14 | 0.053 | 0.099 |
| DDD00651173 | NIH / DDU, TB-active | CC1NC(N(c2ccc(c3cn4c(n3)sc4)cc2)C1=O)=S                  | 5.45   | 328.4 | 3 | -4.773 | 13 | 0.035 | 0.099 |
| DDD01009128 | NIH / DDU, TB-active | CC1(c2ccc(C#N)cc2)NC(N(C1=O)CC(c3ccc(F)c(F)c3)=O)=O      | 2.24   | 369.3 | 2 | -5.199 | 15 | 0.024 | 0.099 |
| DDD00304195 | NIH / DDU, TB-active | COc1ccc(Cn2c(C)c(C)n3c2nc(N(C(NC4=O)=O)C)c34)cc1         | 3.41   | 353.4 | 4 | -3.427 | 13 | 0.098 | 0.771 |
| DDD00853663 | NIH / DDU, TB-active | FC1(CCC(NC(CSC2=Nc3c(C(N2)=O)ccc3)=O)CC1)F               | 13     | 353.4 | 2 | -3.998 | 9  | 0.046 | 0.875 |
| DDD00081512 | NIH / DDU, TB-active | CS(c1cccc(C(Nc2nc3c(o2)ccc(Cl)c3)=O)c1)(=O)=O            | 4.29   | 350.8 | 3 | -5.068 | 14 | 0.073 | 0.099 |
| DDD00409494 | NIH / DDU, TB-active | [O-][n+1]cccc1SCCS(Oc2cccc2)(=O)=O                       | 46.6   | 311.4 | 2 | -3.583 | 11 | 0.070 | 0.771 |
| DDD00957045 | NIH / DDU, TB-active | CN1C(C(C(N(C1=O)C)=O)C(Nc2ccc(SC(F)(F)F)cc2)=O)=O        | 0.59   | 375.3 | 1 | -4.883 | 10 | 0.047 | 0.916 |
| DDD01009094 | NIH / DDU, TB-active | CC(C(Nc1nc2c([nH]1)cccc2)=O)N3C=Nc4c(C3=O)cccc4          | 4.07   | 333.3 | 4 | -4.245 | 16 | 0.030 | 0.099 |
| DDD00293274 | NIH / DDU, TB-active | C[C@@]([H])(C(Nc1nc2c([nH]1)cccc2)=O)N3C=Nc4c(C3=O)cccc4 | 2.92   | 333.3 | 4 | -4.245 | 16 | 0.040 | 0.099 |
| DDD00946831 | NIH / DDU, TB-active | O=C(NCC1CCCC1)CSC2=Nc3c(C(N2)=O)cccc3                    | 4.19   | 331.4 | 2 | -4.752 | 9  | 0.057 | 0.241 |
| DDD00957083 | NIH / DDU, TB-active | FC(c1cccc(C(Cc2nc3c(o2)cccc3)=O)c1)(F)F                  | 0.0039 | 305.3 | 3 | -5.651 | 14 | 0.072 | 0.099 |
| DDD00361107 | NIH / DDU, TB-active | FC(c1nnc(NC(CCc2ncc(c3cccc3)o2)=O)[nH]1)(F)F             | 5.2    | 351.3 | 3 | -5.33  | 12 | 0.146 | 0.099 |



|             |                      |                                                                          |        |       |   |        |    |       |       |
|-------------|----------------------|--------------------------------------------------------------------------|--------|-------|---|--------|----|-------|-------|
| DDD00713267 | NIH / DDU, TB-active | <chem>CCC(C(Nc1nc2c([nH]1)cccc2)=O)N3C(Nc4c(C3=O)cccc4)=O</chem>         | 0.7    | 363.4 | 4 | -4.105 | 16 | 0.035 | 0.099 |
| DDD00935026 | NIH / DDU, TB-active | <chem>CC1=CC(NC(n2nc(C)cc2NC(c3cccc3)=O)=N1)=O</chem>                    | 4.8    | 309.3 | 3 | -3.849 | 14 | 0.026 | 0.771 |
| DDD00057463 | NIH / DDU, TB-active | <chem>COCCNc1nc(SC)nc2c1cccc2</chem>                                     | 10.86  | 249.3 | 2 | -3.507 | 8  | 0.067 | 0.154 |
| DDD00057794 | NIH / DDU, TB-active | <chem>COc1ccc(S(CC(Nc2nnc(C(F)(F)F)s2)=O)=O)cc1</chem>                   | 9.25   | 381.4 | 2 | -4.199 | 9  | 0.114 | 0.916 |
| DDD01012425 | NIH / DDU, TB-active | <chem>Fc1cc(C(Nc2nc3c(o2)cc(Cl)cn3)=O)ccc1C#N</chem>                     | 2.69   | 316.7 | 3 | -4.848 | 13 | 0.087 | 0.099 |
| DDD01007953 | NIH / DDU, TB-active | <chem>FC(C(Cc1nc2c(o1)ccc(Cl)c2)=O)(F)F</chem>                           | 3.03   | 263.6 | 2 | -4.872 | 8  | 0.151 | 0.099 |
| DDD01009186 | NIH / DDU, TB-active | <chem>CC(C1CCC(CC1NC(c2cccc(C(F)(F)F)c2)=O)C)C</chem>                    | 0.015  | 327.4 | 1 | -6.12  | 7  | 0.080 | 0.099 |
| DDD00284199 | NIH / DDU, TB-active | <chem>Nc1ccc(N2CCCC2)c3c1cncc3</chem>                                    | 2.49   | 227.3 | 2 | -3.414 | 9  | 0.122 | 0.099 |
| DDD00079282 | NIH / DDU, TB-active | <chem>Cc1n[nH]c(C)c1S(Nc2ccc3c(c2)[nH]nc3)(=O)=O</chem>                  | 13.125 | 291.3 | 3 | -2.859 | 10 | 0.062 | 0.771 |
| DDD00711226 | NIH / DDU, TB-active | <chem>C[C@@]([H])(C(Nc1nc2c([nH]1)cccc2)=O)N3C(Nc4c(C3=O)cccc4)=O</chem> | 1.47   | 349.3 | 4 | -3.953 | 16 | 0.039 | 0.771 |
| DDD00806477 | NIH / DDU, TB-active | <chem>Cc1ccsc1\C=C(\S2)/C(=O)N=C2N3CCC(CC3</chem>                        | 3.12   | 292.4 | 1 | -4.253 | 8  | 0.064 | 0.164 |
| DDD00304160 | NIH / DDU, TB-active | <chem>CN1C(NC(c2c1nc3n2cc(C)n3Cc4ccc(C)cc4)=O)=O</chem>                  | 9.9    | 323.3 | 4 | -3.431 | 13 | 0.145 | 0.771 |
| DDD00935323 | NIH / DDU, TB-active | <chem>CN(C(c1[nH]c(C)c1S(Nc2ccc3c(c2)cn[nH]3)(=O)=O)c1C)=O)C</chem>      | 32.65  | 361.4 | 3 | -3.486 | 12 | 0.080 | 0.200 |
| DDD00080629 | NIH / DDU, TB-active | <chem>Cc1noc(C)c1S(Nc2ccc3c(c2)[nH]nc3)(=O)=O</chem>                     | 10.665 | 292.3 | 3 | -3.259 | 10 | 0.059 | 0.771 |
| DDD00957043 | NIH / DDU, TB-active | <chem>CN1C(C(C(N(C1=O)C)=O)C(Nc2cccc(C(F)(F)F)c2)=O)=O</chem>            | 1.87   | 343.3 | 1 | -4.79  | 10 | 0.056 | 0.916 |
| DDD00203282 | NIH / DDU, TB-active | <chem>Cc1n[nH]c(C)c1S(Nc2ccc3c(c2)cn[nH]3)(=O)=O</chem>                  | 29     | 291.3 | 3 | -2.866 | 10 | 0.034 | 0.771 |
| DDD00203278 | NIH / DDU, TB-active | <chem>Cc1noc(C)c1S(Nc2ccc3c(c2)cn[nH]3)(=O)=O</chem>                     | 7.92   | 292.3 | 3 | -3.266 | 10 | 0.032 | 0.771 |
| DDD00005964 | NIH / DDU, TB-active | <chem>O=C(C1COc2c(O1)cccc2)NC3CCCC3</chem>                               | 3.05   | 261.3 | 1 | -3.212 | 7  | 0.083 | 0.875 |
| DDD01007956 | NIH / DDU, TB-active | <chem>Fc1ccc2c(c1)oc(CC(C(F)(F)F)=O)n2</chem>                            | 12.2   | 247.1 | 2 | -4.328 | 8  | 0.071 | 0.099 |
| DDD00017596 | NIH / DDU, TB-active | <chem>O=C(C1COc2c(O1)cccc2)NC3CCCC3</chem>                               | 9.06   | 247.3 | 1 | -2.733 | 7  | 0.090 | 0.875 |

|             |                      |                                                                            |       |       |   |        |    |       |       |
|-------------|----------------------|----------------------------------------------------------------------------|-------|-------|---|--------|----|-------|-------|
| DDD00957048 | NIH / DDU, TB-active | <chem>CC(c1ccc(NC(C2C(N(C(N(C2=O)C)=O)C)=O)cc1)C</chem>                    | 0.95  | 317.3 | 1 | -4.06  | 10 | 0.113 | 0.916 |
| DDD00520827 | NIH / DDU, TB-active | <chem>CN1C(NC(c2c1nccc(C(c3cc(F)ccc3O)=O)c2)=O)=O</chem>                   | 3.8   | 315.3 | 3 | -2.993 | 14 | 0.056 | 0.771 |
| DDD00023831 | NIH / DDU, TB-active | <chem>CCOC(c1cc2c(nc1N)cccc2)=O</chem>                                     | 1.46  | 216.2 | 2 | -2.93  | 10 | 0.128 | 0.771 |
| DDD00022015 | NIH / DDU, TB-active | <chem>CC1(CC(C=C(Nc2ccc(C(O)=O)c(O)c2)C1)=O)C</chem>                       | 48.58 | 275.3 | 1 | -3.472 | 10 | 0.089 | 0.099 |
| DDD01007954 | NIH / DDU, TB-active | <chem>FC(C(Cc1nc2c(o1)cccc2)=O)F</chem>                                    | 23.1  | 211.2 | 2 | -3.866 | 8  | 0.148 | 0.099 |
| DDD00956999 | NIH / DDU, TB-active | <chem>CN1C(C(C(N(C1=O)C)=O)C(Nc2ccccc2)=O)=O</chem>                        | 17.1  | 275.3 | 1 | -2.882 | 10 | 0.102 | 0.916 |
| DDD00935325 | NIH / DDU, TB-active | <chem>Cc1[nH]c(C(Nc2ccc(F)cc2)=O)c(C)c1S(Nc3ccc4c(c3)cn[nH]4)(=O)=O</chem> | 0.811 | 427.5 | 4 | -5.452 | 18 | 0.037 | 0.099 |
| DDD00935330 | NIH / DDU, TB-active | <chem>Cc1[nH]c(C(Nc2cccn2)=O)c(C)c1S(Nc3ccc4c(c3)cn[nH]4)(=O)=O</chem>     | 5.13  | 410.5 | 4 | -4.719 | 17 | 0.057 | 0.771 |
| DDD00935328 | NIH / DDU, TB-active | <chem>Cc1[nH]c(C(Nc2ccccc2)=O)c(C)c1S(Nc3ccc4c(c3)cn[nH]4)(=O)=O</chem>    | 1.07  | 409.5 | 4 | -5.168 | 18 | 0.076 | 0.099 |
| DDD00809430 | DDU, TB-active       | <chem>CN1C(Nc2c(C(F)(F)F)ccc(C(F)(F)F)c2)=NC(C(F)(F)F)=CC1=O</chem>        | 0.41  | 405.2 | 2 | -8.187 | 10 | 0.031 | 0.099 |
| DDD00898006 | DDU, TB-active       | <chem>Cc1nc(n2c(C)c1)nc(S(Nc3c(Cl)cccc3Cl)(=O)=O)n2</chem>                 | 26.63 | 372.2 | 3 | -4.556 | 11 | 0.034 | 0.099 |
| DDD00911186 | DDU, TB-active       | <chem>CC(c1ccc(Br)cc1)NC(C(=O)c(c2C3=O)ccn2)=C3Cl</chem>                   | 0.78  | 391.6 | 2 | -6.258 | 15 | 0.070 | 0.164 |
| DDD00810551 | DDU, TB-active       | <chem>COc1nc(c2cc1)c(n3nc4c(CC(NC\C=C\c5cccc5)CC4)c3)ccn2</chem>           | 0.09  | 411.5 | 4 | -7.639 | 19 | 0.055 | 0.164 |
| DDD00816928 | DDU, TB-active       | <chem>Cc1cc(Nc2sc(c3ncccc3)cn2)ncc1</chem>                                 | 0.18  | 268.3 | 3 | -4.618 | 13 | 0.023 | 0.099 |
| DDD00812162 | DDU, TB-active       | <chem>CS(NC(CCC1c(c2ccc(Cl)cc2)nn(c3ccc(Br)cc3)c1)=O)(=O)=O</chem>         | 0.14  | 482.8 | 3 | -7.735 | 16 | 0.073 | 0.099 |
| DDD00898780 | DDU, TB-active       | <chem>Fc1cc(C(C(=O)N(CCC2ccccc2)c(c34)nc(N5CCNCC5)nc3)=N4)cc(F)c1</chem>   | 0.09  | 448.5 | 4 | -5.451 | 18 | 0.061 | 0.164 |
| DDD00923606 | DDU, TB-active       | <chem>Cc1nc(n2c(C)c1)nc(C(NS(c3c(Cl)cccc3)(=O)=O)=O)n2</chem>              | 18.06 | 365.8 | 3 | -4.111 | 12 | 0.111 | 0.771 |
| DDD00911207 | DDU, TB-active       | <chem>Cc1cc(NC(C(=O)c(c2C3=O)cccc2)=C3Cl)c(C)cc1</chem>                    | 0.32  | 312.8 | 2 | -5.301 | 15 | 0.077 | 0.099 |
| DDD01053390 | DDU, TB-active       | <chem>CN1C(Nc2c(C(F)(F)F)cc(C(F)(F)F)cc2)=NC(C(F)(F)F)=CC1=O</chem>        | 0.26  | 405.2 | 2 | -8.112 | 10 | 0.003 | 0.099 |
| DDD00931564 | DDU, TB-active       | <chem>CCCS(c1c(S(NC(c2c(n3nn2)nc(C)cc3C)=O)(=O)=O)cccc1)(=O)=O</chem>      | 26.21 | 437.5 | 3 | -3.982 | 12 | 0.039 | 0.771 |

|             |                             |                                                         |       |       |   |        |    |       |       |
|-------------|-----------------------------|---------------------------------------------------------|-------|-------|---|--------|----|-------|-------|
| DDD00810203 | DDU, TB-active              | CCOc1n(c2nc(CF)c1)nc(S(Nc3c(Cl)c(C)ccc3Cl)(=O)=O)n2     | 6.52  | 434.3 | 3 | -4.985 | 11 | 0.071 | 0.099 |
| DDD01053330 | DDU, TB-active              | COc1n(c2nc(CF)c1)nc(S(Nc3c(Cl)c(C)ccc3Cl)(=O)=O)n2      | 10.71 | 420.2 | 3 | -4.765 | 11 | 0.083 | 0.099 |
| DDD00898025 | DDU, TB-active              | Cc1nc(n2cc1)nc(S(Nc3c(F)cccc3F)(=O)=O)n2                | 42.79 | 325.3 | 3 | -3.244 | 11 | 0.061 | 0.771 |
| DDD00909564 | DDU, TB-active              | CC(C(Nc1ccc(Br)cc1)=O)N2C(=O)c(c3C(C)=N2)noc3C          | 3.39  | 391.2 | 3 | -5.152 | 12 | 0.048 | 0.099 |
| DDD00817112 | DDU, TB-active              | Cc1nc(n2c(Oc3c(c4c(Cl)cc3)nccc4)c1)ncn2                 | >99.9 | 311.7 | 4 | -4.217 | 14 | 0.107 | 0.099 |
| DDD00923584 | DDU, TB-active              | Cc1nc(n2c(C)c1)c(C(NS(c3c(Br)cccc3Br)(=O)=O)=O)n2       | 2.97  | 489.1 | 3 | -5.377 | 12 | 0.036 | 0.099 |
| DDD00902271 | DDU, TB-active              | CCn1c(c2c(S(NC(c3c(n4nn3)nc(C)cc4C)=O)(=O)=O)cccc2)nnn1 | 27.23 | 427.4 | 4 | -4.034 | 13 | 0.052 | 0.333 |
| DDD01269631 | DDU, TB-active              | COc1c(N2C(=O)OC(OC(C)C)=N2)ccc(c3cccc3)c1               | 0.1   | 326.3 | 3 | -4.625 | 14 | 0.070 | 0.099 |
| DDD01053249 | DDU, TB-active              | CN(C(C(=O)c(c1C2=O)cncc1)=C2Cl)Cc3cccc3                 | 0.68  | 312.8 | 2 | -4.492 | 15 | 0.098 | 0.714 |
| DDD00899979 | DDU, TB-active              | CN(C1C(C)(C)S(=O)(=O)C1c2c(Cl)cccc2)C                   | 10.22 | 287.8 | 1 | -3.583 | 6  | 0.077 | 0.889 |
| DDD01053427 | DDU, TB-active              | CC(c1c(c2cccc2)nn(c3ccc(C(F)(F)F)cc3)c1O)=O             | 1.3   | 346.3 | 3 | -5.817 | 16 | 0.097 | 0.099 |
| DDD00816149 | DDU, TB-active              | CS(C(S(C)(=O)=O)CC(N)=O)(=O)=O                          | 52.16 | 229.3 | 0 | -1.278 | 1  | 0.016 | 0.916 |
| DDD01306067 | DDU, TB-active              | CN(C1C(C)(C)C2C1S(=O)(=O)C2)C                           | 49.81 | 203.3 | 0 | -0.999 | 0  | 0.135 | 0.916 |
| DDD00813226 | DDU, TB-active              | N[C@H](C(O)=O)[C@H]1ON=C(Cl)C1                          | 48.23 | 178.6 | 0 | -1.198 | 2  | 0.208 | 0.916 |
| DDD00913915 | DDU, TB-active              | CCc1c(c2c(O)cc1)cccn2                                   | 0.7   | 173.2 | 2 | -2.991 | 9  | 0.156 | 0.099 |
| DDD00908944 | DDU, TB-active              | CC1SC(Nc2ccc(C(C)C)cc2)=NC(=O)C1                        | 1.07  | 262.4 | 1 | -4.176 | 8  | 0.075 | 0.164 |
| DDD01008683 | Eli Lilly / IDRI, TB-active | Cc1n(c2cccc2)nc(CN3CCC4(c(c5CCO4)cccc5)CC3)c1           | 0.725 | 373.5 | 3 | -6.403 | 15 | 0.055 | 0.164 |
| DDD01009593 | Eli Lilly / IDRI, TB-active | Cc1n(c2c(F)cccc2)nc(CN3CCC4(OCCC4)CC3)c1                | 15.16 | 343.4 | 2 | -5.263 | 9  | 0.039 | 0.164 |
| DDD01270367 | TAMU, TB-active             | CNC(c1c(c2oc1c3ccc(O)cc3)c(CN4CCC4)c(O)cc2)=O           | 5.37  | 380.4 | 3 | -4.857 | 15 | 0.045 | 0.164 |
| DDD01305150 | Eli Lilly / IDRI, TB-active | Cc1n(c2ccc(C(O)=O)cc2)nc(CN3CCC4(c(c5CCO4)cccc5)CC3)c1  | 14.97 | 417.5 | 3 | -6.314 | 16 | 0.084 | 0.164 |
| DDD01307205 | TAMU, TB-active             | CNC(c1c(c2oc1c3ccc(O)cc3)c(CN4CC5(COC5)C4)c(O)cc2)=O    | 9.81  | 394.4 | 3 | -4.057 | 15 | 0.027 | 0.771 |

|               |                             |                                                                          |       |       |   |        |    |       |       |
|---------------|-----------------------------|--------------------------------------------------------------------------|-------|-------|---|--------|----|-------|-------|
| DDD01510098   | TAMU, TB-active             | <chem>CNC(c1c(c2oc1c3ccc(O)cc3)c(CN4CC5(COCC5)C4)c(O)cc2)=O</chem>       | 8.01  | 408.4 | 3 | -4.453 | 15 | 0.025 | 0.771 |
| DDD01510167   | TAMU, TB-active             | <chem>CNC(c1c(c2oc1c3ccc(O)cc3)c(CN4C[C@H](O)CCCC4)c(O)cc2)=O</chem>     | 8.51  | 396.4 | 3 | -4.004 | 15 | 0.037 | 0.154 |
| DDD01510238   | TAMU, TB-active             | <chem>Oc1ccc(c2c(C#N)c(c3o2)c(CN4CCCC4)c(O)cc3)cc1</chem>                | 0.3   | 348.4 | 3 | -5.047 | 14 | 0.044 | 0.164 |
| DDD01510278   | Eli Lilly / IDRI, TB-active | <chem>Cc1n(c2cc(C(O)=O)ccc2)nc(CN3CCC4(c(c5CCO4)cccc5)CC3)c1</chem>      | 15.7  | 417.5 | 3 | -6.248 | 16 | 0.074 | 0.164 |
| DDD01510283   | TAMU, TB-active             | <chem>CNC(c1c(c2oc1c3ccc(O)cc3)c(CN4CC(F)CCC4)c(O)cc2)=O</chem>          | 3.86  | 398.4 | 3 | -4.761 | 15 | 0.033 | 0.164 |
| DDD01510824   | Eli Lilly / IDRI, TB-active | <chem>Cc1n(c2ccc(C(O)=O)cc2)nc(CN3CCC4(c(c5CCO4)ccc(F)c5)CC3)c1</chem>   | 12.23 | 435.5 | 3 | -6.337 | 16 | 0.052 | 0.164 |
| DDD01510825   | Eli Lilly / IDRI, TB-active | <chem>Cc1n(c2ccc(C(O)=O)cc2)nc(CN3CCC4(c(c5CCO4)cc(F)c5)CC3)c1</chem>    | 12.81 | 435.5 | 3 | -6.32  | 16 | 0.070 | 0.164 |
| H3DTB-0000994 | UCT, TB-active              | <chem>CN(c1ncnc(C(Nc2cccc2)=O)c1)Cc3cc(C(F)(F)F)cc3</chem>               | 0.1   | 386.4 | 3 | -6.137 | 17 | 0.043 | 0.164 |
| H3DTB-0002745 | UCT, TB-active              | <chem>CN(c1ncnc(C(Nc2ccc(N3CCN(C)CC3)c2)=O)c1)Cc4ccc(C(F)(F)F)cc4</chem> | 0.06  | 484.5 | 3 | -5.736 | 17 | 0.039 | 0.056 |
| H3DTB-0002574 | UCT, TB-active              | <chem>CN(c1ncnc(C(Nc2scnn2)=O)c1)Cc3cnc(C(F)(F)F)cc3</chem>              | 3.59  | 395.4 | 3 | -4.879 | 12 | 0.065 | 0.154 |
| H3DTB-0001208 | UCT, TB-active              | <chem>CN(c1ncnc(C(Nc2scnn2)=O)c1)Cc3ccc(F)cc3</chem>                     | 0.52  | 344.4 | 3 | -4.01  | 13 | 0.099 | 0.154 |
| H3DTB-0001620 | UCT, TB-active              | <chem>CN(c1ncnc(C(Nc2scnn2)=O)c1)Cc3ccc(C(F)(F)F)cc3</chem>              | 0.07  | 394.4 | 3 | -5.223 | 13 | 0.084 | 0.164 |
| H3DTB-0005893 | UCT, TB-active              | <chem>O=C(c1cc(N(Cc2ccc(F)cc2)C)ncn1)Nc3scc(CN(C)C)n3</chem>             | 0.6   | 400.5 | 3 | -4.649 | 14 | 0.030 | 0.179 |
| H3DTB-0002846 | UCT, TB-active              | <chem>Cc1scc(c2ccc(Oc3nnc(C(=O)OC)cc3)c(F)c2)n1</chem>                   | 3.02  | 345.3 | 3 | -5.194 | 14 | 0.060 | 0.099 |
| H3DTB-0002841 | UCT, TB-active              | <chem>O=C(Nc1c(C(=O)O)cccc1)CCc2ccc(C(F)(F)F)cc2</chem>                  | 4.12  | 337.3 | 2 | -5.555 | 14 | 0.044 | 0.099 |
| H3DTB-0002899 | UCT, TB-active              | <chem>O=C(O)c1cccc1NC(=O)CCc2ccc(c3ccc(Cl)cc3)cc2</chem>                 | 0.09  | 379.8 | 3 | -7.283 | 20 | 0.094 | 0.099 |
| H3DTB-0002895 | UCT, TB-active              | <chem>O=C(O)c1cccc1NC(=O)CNc2ccc(Br)cc2</chem>                           | 3.27  | 349.2 | 2 | -4.686 | 14 | 0.093 | 0.099 |
| H3DTB-0001187 | UCT, TB-active              | <chem>Nc1cnc(C(=O)O)cc1</chem>                                           | >99.9 | 138.1 | 1 | -0.924 | 6  | 0.170 | 0.916 |
| H3DTB-0002563 | UCT, TB-active              | <chem>Cc1sc(C(c2sc(c3n2)cccc3)=NO)nn1</chem>                             | 5.33  | 276.3 | 3 | -4.439 | 10 | 0.076 | 0.099 |
| H3DTB-0002900 | UCT, TB-active              | <chem>ON=C(c1sc(c2n1)cccc2)c3sc(C(F)(F)F)nn3</chem>                      | 0.27  | 330.3 | 3 | -5.157 | 10 | 0.119 | 0.099 |

|               |                   |                                                                           |       |       |   |        |    |       |       |
|---------------|-------------------|---------------------------------------------------------------------------|-------|-------|---|--------|----|-------|-------|
| H3DTB-0002461 | UCT, TB-active    | <chem>Cc1nc(c2c(N)c(c3c(C)n2)C(=O)N(Cc4c(Cl)ccc4)C3=O)on1</chem>          | 0.11  | 383.8 | 3 | -4.787 | 15 | 0.059 | 0.099 |
| X-001         | Sanofi, TB-active | <chem>CN(c1c(c2nc(c13)C(C)=CN(c4sccn4)C3=O)cccc2C(F)(F)F)CC(O)(C)C</chem> | <0.01 | 462.5 | 4 | -5.848 | 15 | 0.024 | 0.099 |
| X-002         | Sanofi, TB-active | <chem>CN(C1CN(c2c(c3nc(c24)C(C)=CN(c5scn5)C4=O)cccc3C(F)(F)F)CC1)C</chem> | 0.04  | 473.5 | 4 | -5.237 | 15 | 0.051 | 0.179 |
| X-003         | Sanofi, TB-active | <chem>Nc1c(c2[nH]c1c3nnc(c4cccc4)o3)ncc(c25)cccc5</chem>                  | <0.01 | 327.3 | 5 | -5.692 | 19 | 0.095 | 0.099 |
| X-004         | Sanofi, TB-active | <chem>CN(c1cccc1)C(CN2CCN(c3ncnc(n4cnc4)c3)CC2)=O</chem>                  | 11.77 | 377.4 | 3 | -2.66  | 14 | 0.085 | 0.200 |
| X-005         | Sanofi, TB-active | <chem>CCn1ncc(c2c(c3c(c4n2)[nH]nc4N)cccc3)c1</chem>                       | 3.99  | 278.3 | 4 | -4.211 | 13 | 0.106 | 0.099 |
| X-006         | Sanofi, TB-active | <chem>Nc1c(c2[nH]c1c3nc(c4cccc4)no3)ncc(c25)cccc5</chem>                  | <0.01 | 327.3 | 5 | -5.696 | 19 | 0.008 | 0.099 |
| X-007         | Sanofi, TB-active | <chem>Nc1c(c2[nH]n1)nc(c3sc(c4c3)cccc4)c(c25)cccc5</chem>                 | <0.01 | 316.4 | 5 | -6.687 | 18 | 0.093 | 0.099 |
| X-008         | Sanofi, TB-active | <chem>CCC(OC(c1c(N)c(c2[nH]1)c(C)nc(c23)c(C)cc(N(CC)CC)c3)=O)C</chem>     | <0.01 | 382.5 | 3 | -5.75  | 12 | 0.059 | 0.099 |
| X-009         | Sanofi, TB-active | <chem>CN1c(c2C(=O)N1c3cc(C(F)(F)F)ccc3)nc(c4c2O)c(C(F)(F)F)ccc4</chem>    | <0.01 | 427.3 | 4 | -5.922 | 16 | 0.013 | 0.099 |
| X-010         | Sanofi, TB-active | <chem>CCc1c(N2C(=O)N=C(NC)N=C2)c(CC)cc(Br)c1</chem>                       | 13.62 | 337.2 | 2 | -5.101 | 9  | 0.083 | 0.099 |
| X-011         | Sanofi, TB-active | <chem>CC(c1c(c(N2CCOCC2)c(c3n1)cccc3C(F)(F)F)C(=O)N4c5sccn5)=C4</chem>    | <0.01 | 446.4 | 4 | -5.036 | 15 | 0.016 | 0.099 |
| X-012         | Sanofi, TB-active | <chem>Oc1c(c2nc(C(F)F)c1C(Nc3sccn3)=O)ccc2C(F)(F)F</chem>                 | 0.33  | 389.3 | 3 | -5.584 | 13 | 0.070 | 0.099 |
| X-013         | Sanofi, TB-active | <chem>CC1c(c2C(=O)N1c3sccn3)nc(c4c2O)c(C(F)(F)F)ccc4C(F)(F)F</chem>       | 0.09  | 433.3 | 3 | -5.403 | 13 | 0.064 | 0.099 |
| X-014         | Sanofi, TB-active | <chem>Oc1c(c2nc(C(Cl)Cl)c1C(Nc3sc(c4n3)ccc4)=O)cccc2C(F)(F)F</chem>       | 0.03  | 472.3 | 4 | -7.79  | 17 | 0.049 | 0.099 |
| X-015         | Sanofi, TB-active | <chem>CCCNC(N=CN(c1c(CC)cccc1CC)C2=O)=N2</chem>                           | 18.39 | 286.4 | 2 | -4.63  | 9  | 0.031 | 0.099 |
| X-016         | Sanofi, TB-active | <chem>CON1c(c2C(=O)C(C(NN)=O)=C1C)ccc(Cl)c2</chem>                        | 50.57 | 281.7 | 2 | -2.718 | 10 | 0.166 | 0.916 |
| X-017         | Sanofi, TB-active | <chem>CN1CCN(c2c(c3nc(c24)C(C)=CN(c5sccn5)C4=O)cccc3C(F)(F)F)CC1</chem>   | <0.01 | 459.5 | 4 | -4.854 | 15 | 0.051 | 0.056 |
| X-018         | Sanofi, TB-active | <chem>CC(c(c1C(=O)N2c3sccn3)nc(c4c1O)c(C(F)(F)F)ccc4)=C2</chem>           | <0.01 | 377.3 | 4 | -4.801 | 15 | 0.033 | 0.099 |
| IDR-0469041   | IDRI, TB-active   | <chem>CC(c1ccc(n2c(c3c(C4CCN(Cc5cccc5)C4)c2)cccc3)cc1)(C)C</chem>         | <0.01 | 422.6 | 4 | -9.981 | 20 | 0.013 | 0.164 |

|             |                 |                                                                           |       |       |   |        |    |       |       |
|-------------|-----------------|---------------------------------------------------------------------------|-------|-------|---|--------|----|-------|-------|
| IDR-0514734 | IDRI, TB-active | <chem>COCc1ccc(n2c(c3c(C4CCN(Cc5ccccc5)CC4)n2)cccc3)cc1</chem>            | 0.02  | 411.5 | 4 | -7.869 | 19 | 0.028 | 0.164 |
| IDR-0527745 | IDRI, TB-active | <chem>COc1snc(c2ccc(n3c(c4c(C5CCN(Cc6ccc6)CC5)c3)cccc4)cc2)n1</chem>      | <0.01 | 480.6 | 5 | -9.243 | 22 | 0.067 | 0.164 |
| IDR-0528696 | IDRI, TB-active | <chem>COc1scc(c2ccc(n3c(c4c(C5CCN(Cc6ccc6)CC5)c3)cccc4)cc2)n1</chem>      | <0.01 | 479.6 | 5 | -9.899 | 23 | 0.050 | 0.164 |
| IDR-0532279 | IDRI, TB-active | <chem>COCc1cnc(n2c(c3c(C4CCN(Cc5ccccc5)CC4)n2)cccc3)cc1</chem>            | 0.02  | 412.5 | 4 | -7.265 | 18 | 0.027 | 0.164 |
| IDR-0497562 | IDRI, TB-active | <chem>CNc1c2c(CCCO2)nc(SC)n1</chem>                                       | 20.83 | 211.3 | 1 | -2.109 | 4  | 0.042 | 0.916 |
| IDR-0528776 | IDRI, TB-active | <chem>CNc1c2c(CCCO2)nc(OC)n1</chem>                                       | 64.37 | 195.2 | 1 | -1.394 | 4  | 0.059 | 0.916 |
| IDR-0528780 | IDRI, TB-active | <chem>COc1nc(NCCOc2ccccc2)c3c(CCCO3)n1</chem>                             | 1.95  | 301.3 | 2 | -3.422 | 10 | 0.066 | 0.099 |
| IDR-0532039 | IDRI, TB-active | <chem>CNc1c2c(CCCO2)nc(C(C)C)n1</chem>                                    | 26.45 | 207.3 | 1 | -2.425 | 4  | 0.028 | 0.916 |
| IDR-0532131 | IDRI, TB-active | <chem>CNc1nc(SC)nc(c12)cccc2</chem>                                       | 8.01  | 205.3 | 2 | -3.092 | 8  | 0.045 | 0.154 |
| IDR-0532133 | IDRI, TB-active | <chem>CCOc1nc(NC)c2c(CCCO2)n1</chem>                                      | 53.97 | 209.2 | 1 | -1.712 | 4  | 0.038 | 0.916 |
| IDR-0504706 | IDRI, TB-active | <chem>COc1ncc(n2c(C)cc(CN3CCC4(c(c5CCO4)cccc5)CC3)n2)cc1</chem>           | 1.31  | 404.5 | 3 | -6.003 | 14 | 0.050 | 0.154 |
| IDR-0021254 | IDRI, TB-active | <chem>Cc1oc(c2ccccc2)cc1CN3CCC4(c5c(ccs5)CCO4)CC3</chem>                  | 0.03  | 379.5 | 3 | -7.377 | 14 | 0.025 | 0.164 |
| IDR-0514759 | IDRI, TB-active | <chem>Cc1n(c2ccc(OC(F)(F)F)cc2)nc(CN3CCC4(c(c5CCO4)ccc(F)c5)CC3)c1</chem> | 0.3   | 475.5 | 3 | -7.808 | 15 | 0.050 | 0.164 |
| IDR-0484833 | IDRI, TB-active | <chem>NC(c1sc(n2cnc2)cc1OCCc3cc(F)ccc3)=O</chem>                          | 6.32  | 331.4 | 3 | -4.937 | 14 | 0.079 | 0.099 |
| IDR-0338595 | IDRI, TB-active | <chem>COc1ccc(CCOc2cc(N3CCOCC3)sc2C(=O)N)cc1</chem>                       | 5.71  | 362.4 | 2 | -3.983 | 11 | 0.081 | 0.099 |
| IDR-0492028 | IDRI, TB-active | <chem>CNC(c1c(OCCc2ccc(OC)cc2)ccc(N3CCOCC3)c1)=O</chem>                   | 6.5   | 370.4 | 2 | -4.323 | 13 | 0.021 | 0.099 |
| IDR-0275902 | IDRI, TB-active | <chem>NC(c1sc(N2CCOCC2)cc1OCCc3ccccc3)=O</chem>                           | 6.18  | 332.4 | 2 | -3.864 | 11 | 0.107 | 0.099 |
| IDR-0341930 | IDRI, TB-active | <chem>CCc1n(CCCCOc2ccccc2)c(c3n1)cc(C)cc3</chem>                          | 0.15  | 308.4 | 3 | -6.618 | 13 | 0.022 | 0.164 |
| IDR-0390228 | IDRI, TB-active | <chem>CCc1n(CCCSc2oc(c3ccc(Cl)cc3)nn2)c(c4n1)cc(C)cc4</chem>              | 0.09  | 412.9 | 4 | -8.359 | 15 | 0.024 | 0.164 |
| IDR-0461471 | IDRI, TB-active | <chem>CC(CC(N1CCC(c2ccccc2)CC1)(C)C)(C)C</chem>                           | 3.76  | 273.5 | 1 | -5.828 | 6  | 0.012 | 0.164 |
| IDR-0376022 | IDRI, TB-active | <chem>CCC1(N2CCC(c3ccccc3)CC2)CCCC1</chem>                                | 3.16  | 271.4 | 1 | -5.855 | 6  | 0.016 | 0.164 |
| IDR-0303213 | IDRI, TB-active | <chem>C(c1cccc(c12)ccn2)N3CCC(c4[nH]c(c5n4)cccc5)CC3</chem>               | 8.02  | 342.4 | 4 | -6.009 | 16 | 0.023 | 0.164 |
| IDR-0351615 | IDRI, TB-active | <chem>Fc1ccc(Cn2c(c3cn2)ccnc3c4occcc4)cc1</chem>                          | 0.33  | 293.3 | 4 | -5.558 | 16 | 0.056 | 0.099 |

|             |                 |                                                                                   |       |       |   |        |    |       |       |
|-------------|-----------------|-----------------------------------------------------------------------------------|-------|-------|---|--------|----|-------|-------|
| IDR-0469026 | IDRI, TB-active | <chem>COc1ccc(c2nccc(c23)n(Cc4ccc(F)cc4)n c3)cc1</chem>                           | 0.09  | 333.4 | 4 | -6.42  | 18 | 0.035 | 0.099 |
| IDR-0392810 | IDRI, TB-active | <chem>C(c1ccc(Oc2cccc2)cc1)n3c(c4cn3)cc nc4N5CCCCC5</chem>                        | <0.01 | 384.5 | 4 | -6.653 | 18 | 0.020 | 0.241 |
| GSK001      | GSK, TB-active  | <chem>CCc1nn(CC)c(C(N[C@H]2CN(C(c3c(c4 oc3)cccc4)=O)[C@H](C(=O)N)C2)=O)c 1</chem> | 7.43  | 423.5 | 3 | -4.998 | 14 | 0.058 | 0.200 |
| GSK002      | GSK, TB-active  | <chem>Cc1nc([C@@])(c2sc(Nc3nn(Cc4nc(C)sc 4)cc3)nn2)(O)C)sc1</chem>                | 8.42  | 419.5 | 4 | -5.831 | 11 | 0.023 | 0.099 |
| GSK003      | GSK, TB-active  | <chem>CCc1nccc(C(=S)N)c1</chem>                                                   | 36.62 | 166.2 | 1 | -3.531 | 6  | 0.056 | 0.916 |

(<sup>1</sup>) Acronyms: UBA, undefined bactericidal activity; PZA, pyrazinamide; NIH, National Institute of Health; DDU, Drug Discovery Unit University of Dundee; TAMU, Texas A&M University; UCT, University of Cape Town; IDRI, Infectious Disease Research Institute; GSK, GlaxoSmithKline. Molecular Descriptors: Arom\_Rings, Number of aromatic rings; Mol\_Sol, solubility; sp2, sp2 carbon count; IW1\_VS, hydrophobicity / lipophilicity unbalance; plasma PB, predicted plasma protein binding

**Supplementary Table 2.** List of all 69 calculated molecular descriptors evaluated. Descriptors that were included in Principal Component Analysis (PCA) and / or building the consensus model are indicated with a 'Y'. Descriptors that were not included in PCA are indicated with an 'N'.

| Descriptor    | Source   | PCA | Model |
|---------------|----------|-----|-------|
| HAC           | Stardrop | Y   | Y     |
| AromaticRings | Stardrop | Y   | Y     |
| C_count       | Stardrop | Y   | Y     |
| Sp3_count     | Stardrop | Y   | Y     |
| TPSA          | Stardrop | Y   | Y     |
| logD          | Stardrop | Y   | Y     |
| HBD           | Stardrop | Y   | Y     |
| HBA           | Stardrop | Y   | Y     |
| Flexibility   | Stardrop | Y   | Y     |
| RotBonds      | Stardrop | Y   | Y     |
| FU4           | Volsurf+ | Y   | Y     |
| FU8           | Volsurf+ | Y   | Y     |
| A             | Volsurf+ | Y   | Y     |
| ACACAC        | Volsurf+ | Y   | Y     |
| ACACDO        | Volsurf+ | Y   | Y     |
| ACDODO        | Volsurf+ | Y   | Y     |
| AUS7_4        | Volsurf+ | Y   | Y     |
| CD1           | Volsurf+ | Y   | Y     |
| CP            | Volsurf+ | Y   | Y     |
| CW2           | Volsurf+ | Y   | Y     |
| D1            | Volsurf+ | Y   | Y     |
| DD8           | Volsurf+ | Y   | Y     |
| DIFF          | Volsurf+ | Y   | Y     |
| DODODO        | Volsurf+ | Y   | Y     |
| DRACAC        | Volsurf+ | Y   | Y     |
| DRACDO        | Volsurf+ | Y   | Y     |
| DRDOD         | Volsurf+ | Y   | Y     |
| DRDRAC        | Volsurf+ | Y   | Y     |
| DRDRDO        | Volsurf+ | Y   | Y     |
| DRDRDR        | Volsurf+ | Y   | Y     |
| FLEX          | Volsurf+ | Y   | Y     |
| FLEX_RB       | Volsurf+ | Y   | Y     |
| G             | Volsurf+ | Y   | Y     |
| HL1           | Volsurf+ | Y   | Y     |
| HAS           | Volsurf+ | Y   | Y     |



---

|                |               |   |   |
|----------------|---------------|---|---|
| ID1            | Volsurf+      | Y | Y |
| IW1            | Volsurf+      | Y | Y |
| L4LgS          | Volsurf+      | Y | Y |
| LOGP_cHex      | Volsurf+      | Y | Y |
| LOGP_nOct      | Volsurf+      | Y | Y |
| LgD8           | Volsurf+      | Y | Y |
| MW             | Volsurf+      | Y | Y |
| PB             | Volsurf+      | Y | Y |
| PHSAR          | Volsurf+      | Y | Y |
| POL            | Volsurf+      | Y | Y |
| PSA            | Volsurf+      | Y | Y |
| PSAR           | Volsurf+      | Y | Y |
| R              | Volsurf+      | Y | Y |
| S              | Volsurf+      | Y | Y |
| V              | Volsurf+      | Y | Y |
| VD             | Volsurf+      | Y | Y |
| W2             | Volsurf+      | Y | Y |
| W6             | Volsurf+      | Y | Y |
| WN6            | Volsurf+      | Y | Y |
| WO5            | Volsurf+      | Y | Y |
| FmF            | PipelinePilot | Y | Y |
| Ring_count     | PipelinePilot | Y | Y |
| Mol_sol        | PipelinePilot | Y | Y |
| sp2            | PipelinePilot | Y | Y |
| fSP3           | PipelinePilot | Y | Y |
| Alogp_MR       | PipelinePilot | Y | Y |
| Wiener         | PipelinePilot | Y | Y |
| Zagreb         | PipelinePilot | Y | Y |
| N_O_Count      | PipelinePilot | Y | Y |
| Num_SpiroAtoms | PipelinePilot | N | Y |
| E-state_Keys   | PipelinePilot | N | Y |
| E-state_Counts | PipelinePilot | N | Y |
| SCFP_4         | PipelinePilot | N | Y |
| FCFP12         | PipelinePilot | N | Y |

---

## SUPPLEMENTARY FIGURES

**Supplementary Figure 1.** Plasma protein binding versus caseum binding for anti-tuberculosis drugs. Protein binding was measured in rabbit plasma and rabbit caseum for 20 drugs using the rapid equilibrium dialysis assay.

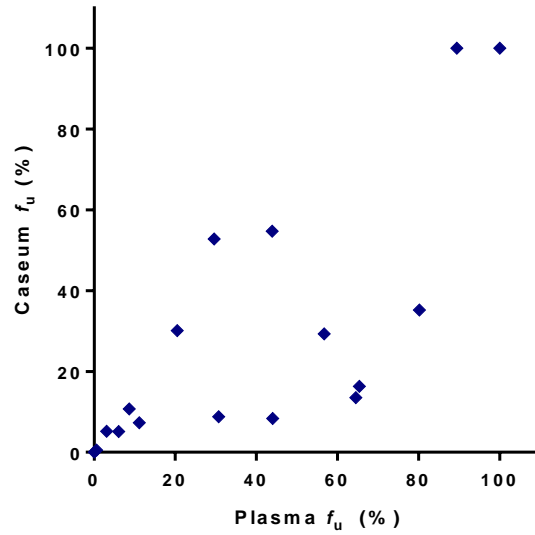

**Supplementary Figure 2.** Effect of modulation of the lipid and protein contents in the surrogate matrix on drug binding. Several versions of the surrogate were generated in which we (i) omitted induction of lipid droplet formation with OA, (ii) omitted the protein denaturing step or (iii) extracted the lipids only. These assays were performed in the cassette format with moxifloxacin (MXF), linezolid (LNZ), bedaquiline (BDQ), PA-824, ethambutol (EMB) and pyrazinamide (PZA). Each bar is the average of three representative experiments with standard deviations (error bars). Manipulating the composition of the surrogate matrix affected binding of each drug to different degrees. Only bedaquiline binding remained high and constant ( $f_u < 0.01$ ) under all conditions.

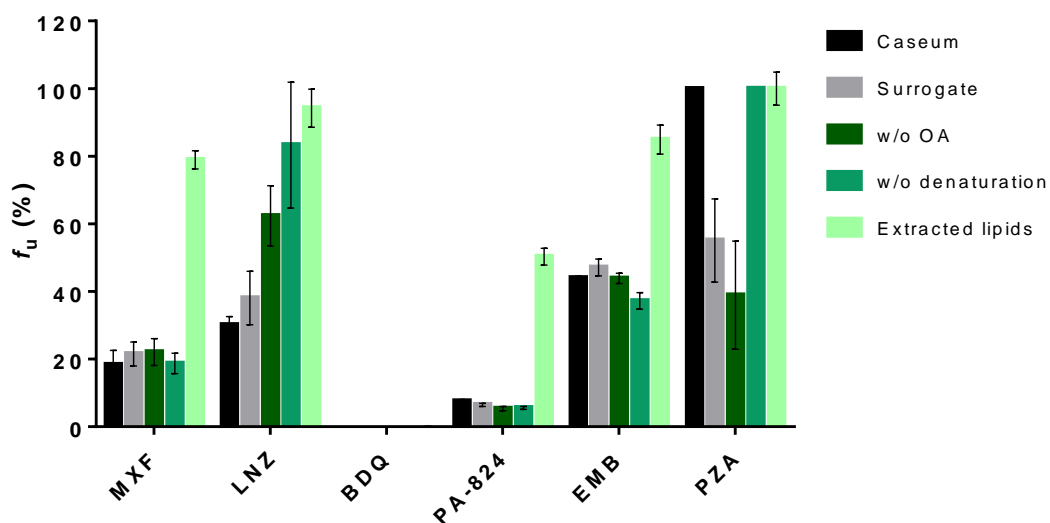

**Supplementary Figure 3.** Fraction unbound in caseum surrogate (%), molecular weight and cLogP of selected compounds containing the pyrazinamide scaffold.

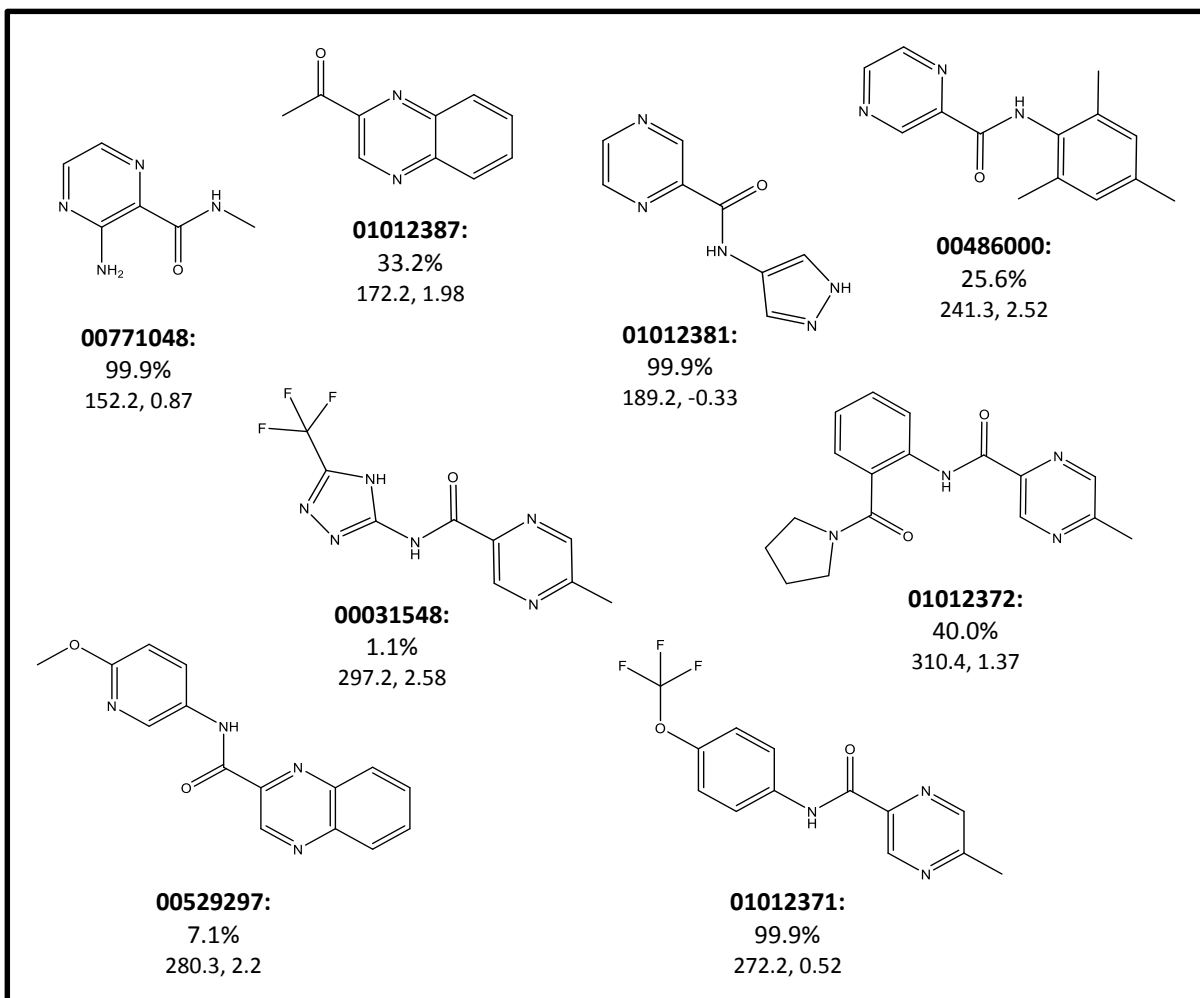

**Supplementary Figure 4a** Parameters that show the strongest correlation with the unbound fractions of 279 compounds in caseum surrogate (based on the p1 and p2 PCA loadings).

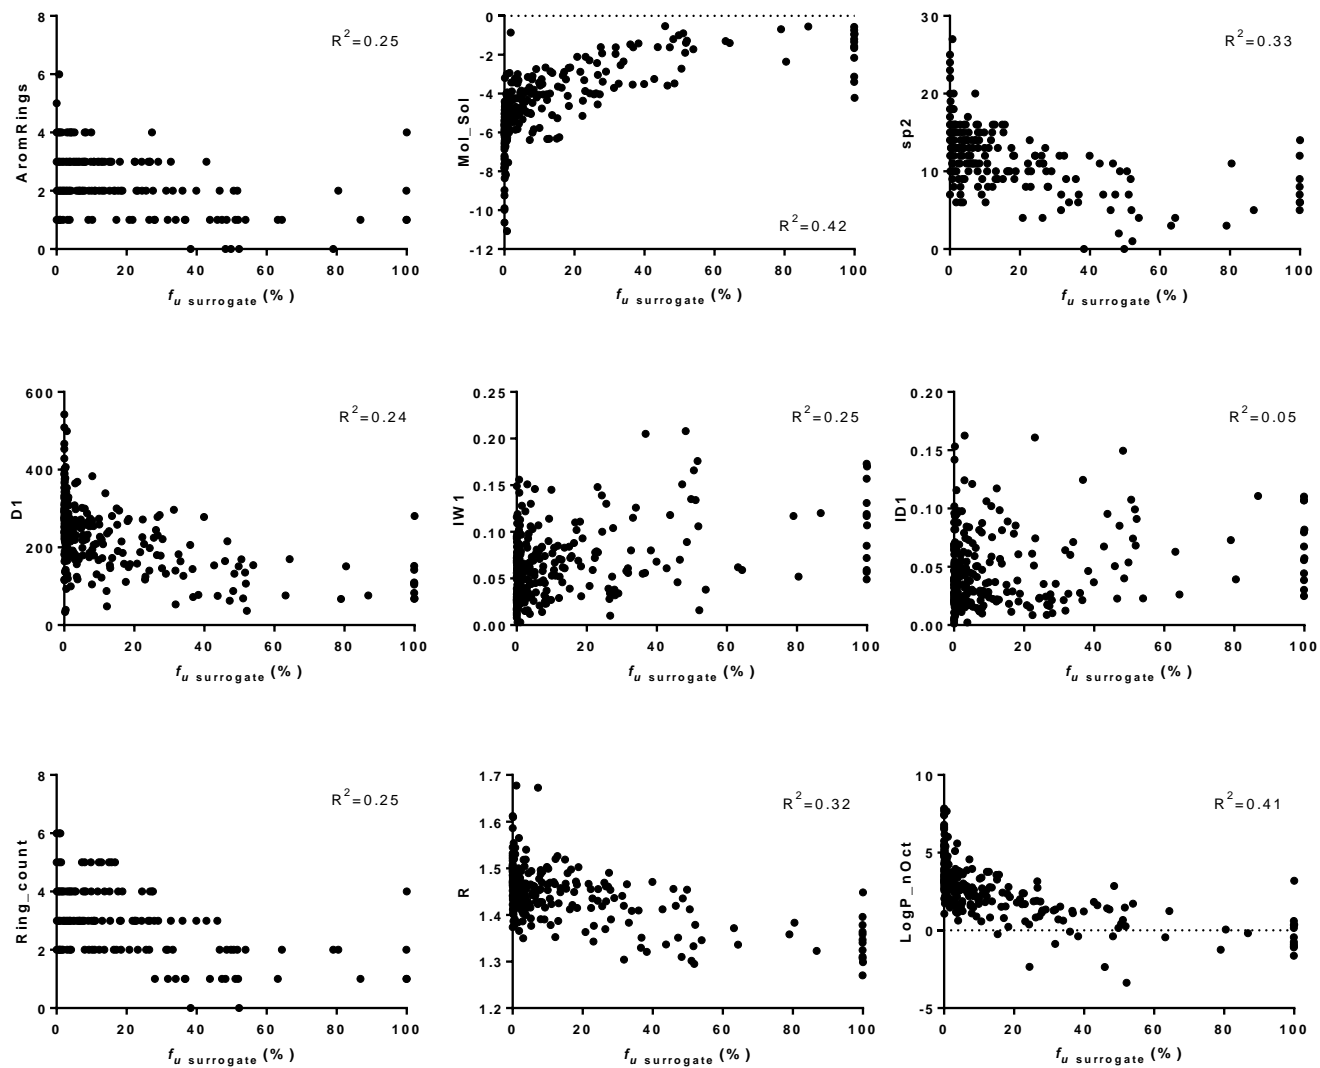

**Supplementary Figure 4b** The PCA scores t1 and t2 are new variables summarizing how the different compounds (described by the set of 64 molecular descriptors) are situated with respect to each other. The plot shows the presence of outliers, similarities, groups and other patterns in the data set.

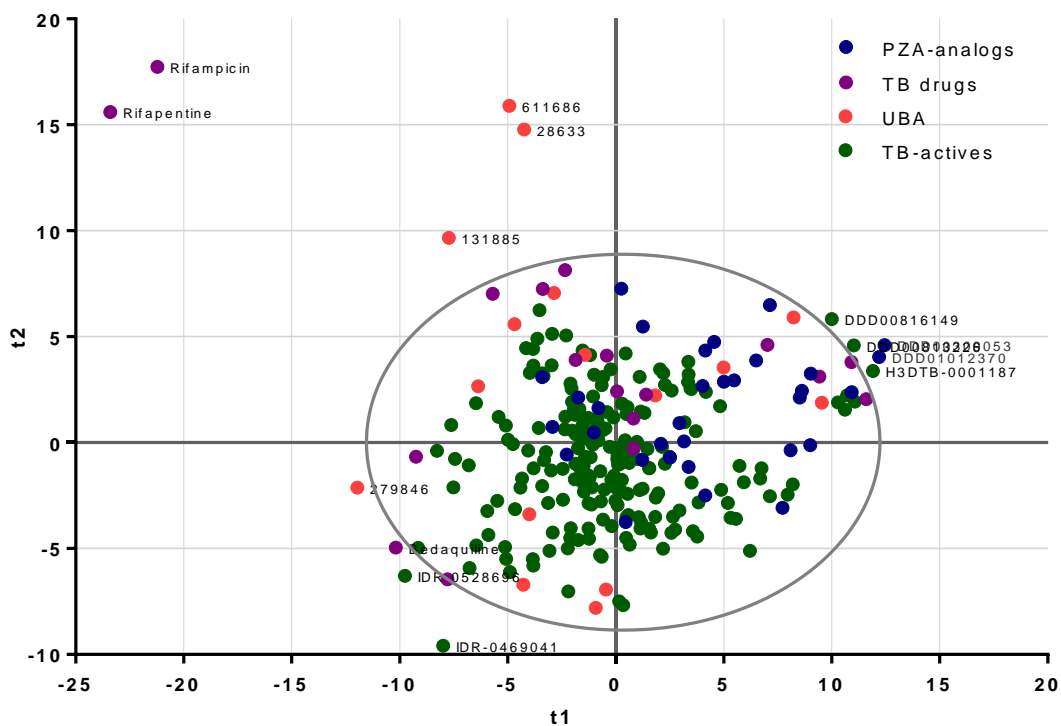

**Supplementary Figure 4c.** Correlation between ciPFI (cLogP + #Ar) of 279 compounds and their unbound fractions in caseum surrogate.

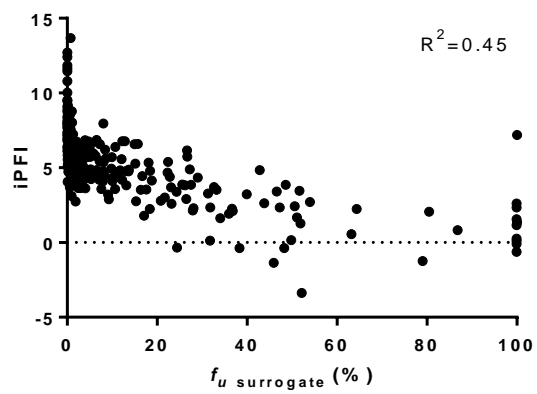

Supplement: NIHMS816045-supplement-Supplemental_Material.pdf [file NIHMS816045-supplement-Supplemental_Material.pdf]
